# Supplementary material for: Aptamer targeted therapy potentiates immune checkpoint blockade in triple-negative breast cancer
Source: Springer Nature journal article supplement (doi:10.1186/s13046-020-01694-9), 2020-09-06
Supplement: MOESM1 [file 18355216]

## Supplementary Information

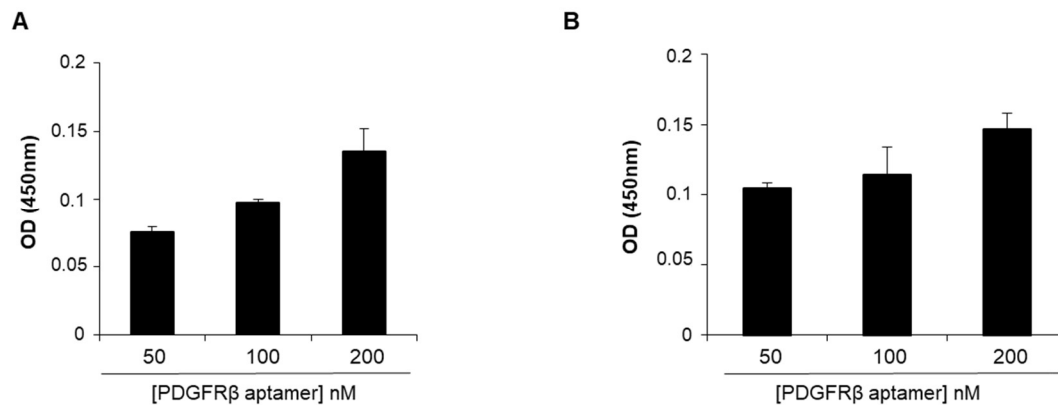

**Figure S1. PDGFR $\beta$  Gint4.T aptamer specifically binds to human and mouse lymphocytes.** Cell-ELISA assays on activated human (A) and mouse (B) lymphocytes with 5'-biotinylated PDGFR $\beta$  Gint4.T aptamer at the indicated concentrations. The background binding value for 5'-biotinylated Scr aptamer was subtracted from each data point. Data shown are mean  $\pm$  SD (n=3).

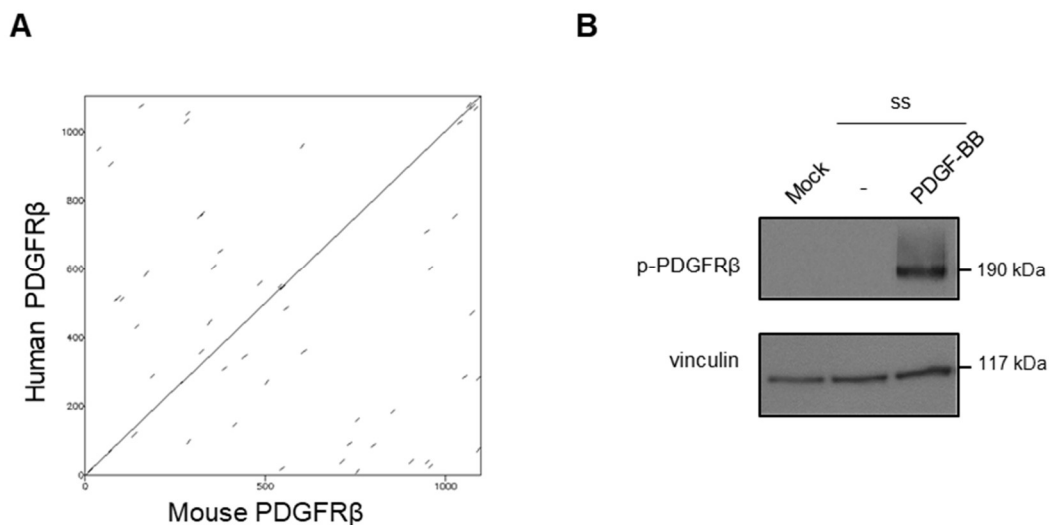

**Figure S2. Similarity of human and mouse PDGFR $\beta$ .** (A) The dotplot matrix shows the sequence similarity between human and mouse PDGFR $\beta$  protein obtained by using Dotmatcher tool (EMBOSS) with a scoring matrix Blosum 62 and a threshold line of 13. (B) NIH3T3 cells were mock-treated or serum-starved (ss) and then left untreated (-) or stimulated with PDGF-BB, as indicated. Cell lysates were immunoblotted with the indicated antibodies. Molecular weights of indicated proteins are reported.

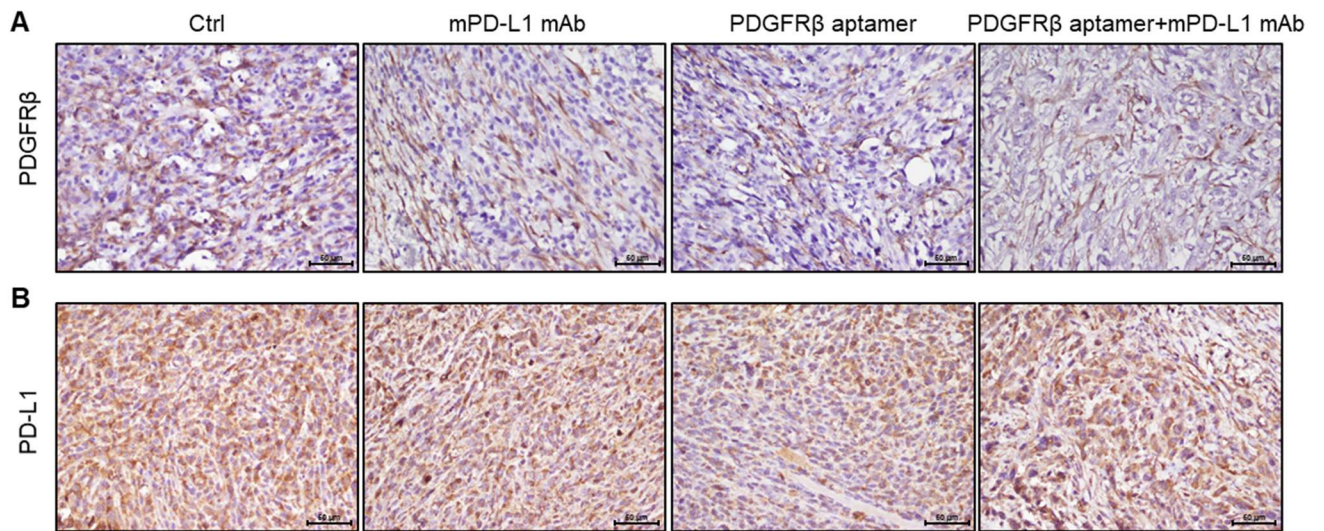

**Figure S3. PDGFR $\beta$  and PD-L1 immunohistochemical expression.** Shown are images from one representative tumor for each treatment group immunostained with anti-PDGFR $\beta$  (A) and anti-PD-L1 (B) antibodies. Magnification 40  $\times$ , scale bar = 50  $\mu$ m.
